# Supplementary material for: No difference in small bowel microbiota between patients with irritable bowel syndrome and healthy controls
Source: PubMed Central journal article supplement (PMC4330528; doi:10.1038/srep08508), 2015-02-17

**No difference in small bowel microbiota between patients with irritable bowel syndrome and healthy controls**

Dlugosz A, Winckler B, Lundin E, Zakikhany K, Sandström G, Ye W, Engstrand L, Lindberg G.

**Supplementary Figure 1.** Cluster analysis of samples from IBS patients and controls using partitioning around medoids (PAM). A: PAM clustering of samples using Bray-Curtis distance. B: PAM clustering of samples using Jensen-Shannon divergence. C: PAM clustering of samples using weighted UniFrac distance.

**Supplementary Figure 2:** Multidimensional scaling (MDS). A: MDS coordinate 2 for Bray-Curtis distance indicates a separation of controls and patients, and coordinate 5 indicates a separation of controls from the IBS phenotype. B: MDS coordinate 2 for Jensen-Shannon divergence indicate a separation of controls and patients. C: MDS coordinate 2 for UniFrac indicate a separation of controls and patients

Supplementary Figure 1A

Bray-Curtis

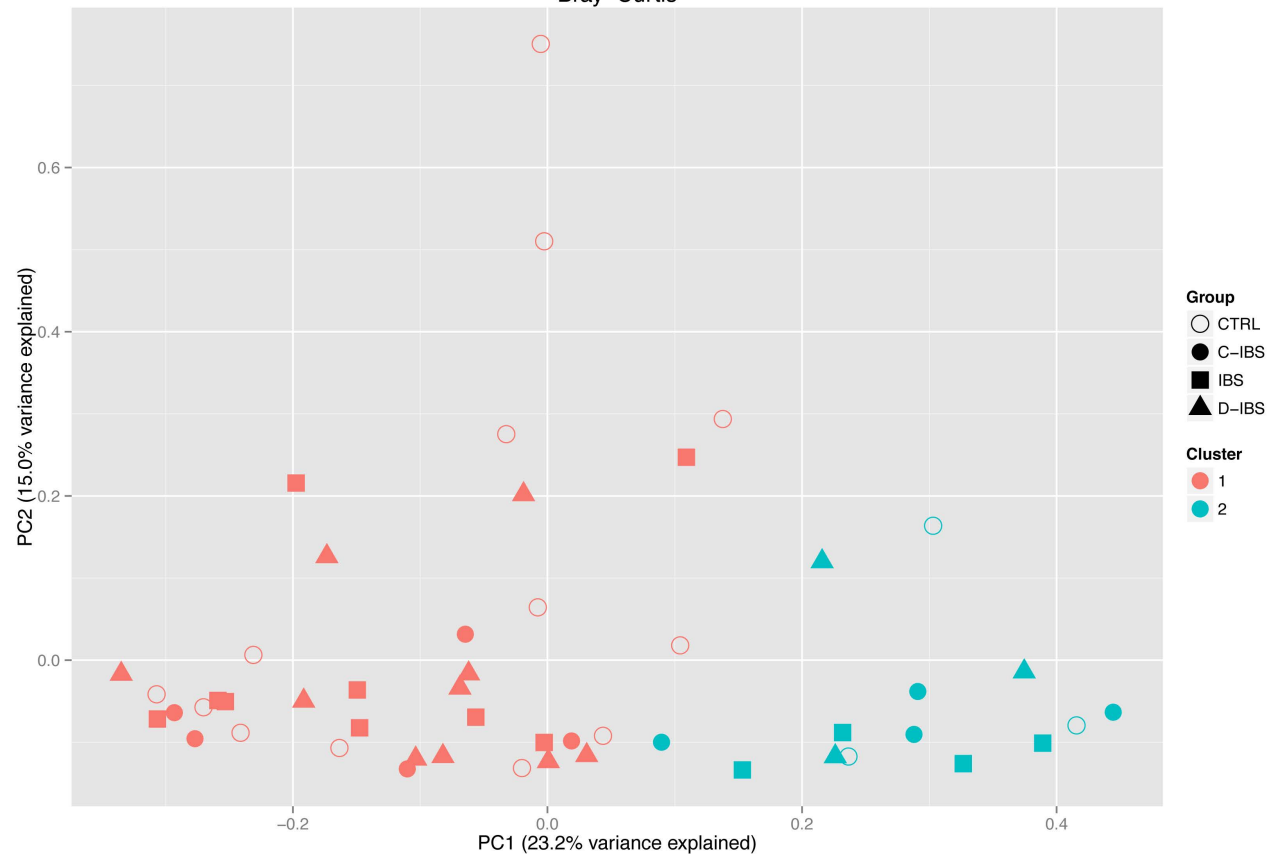

Supplementary Figure 1B

JSD

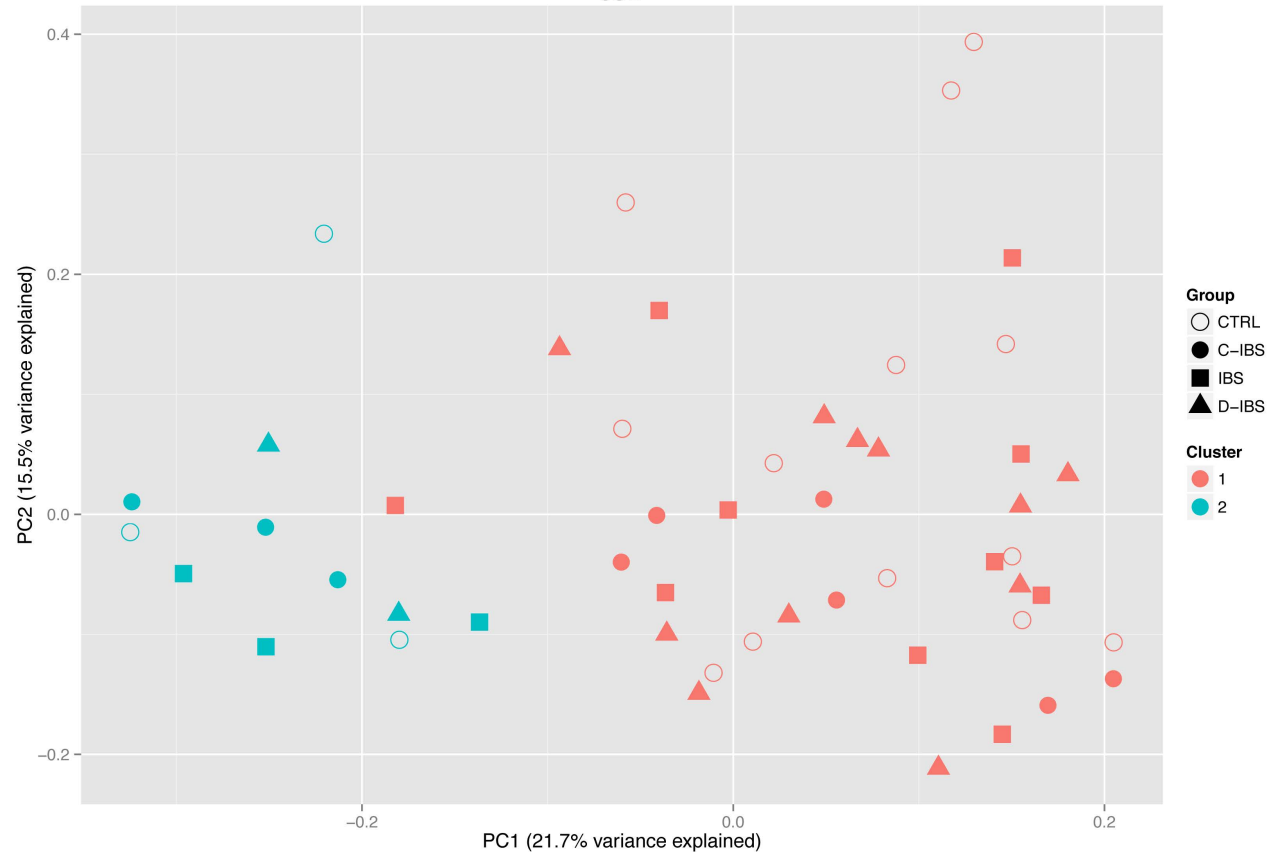

## Weighted UniFrac

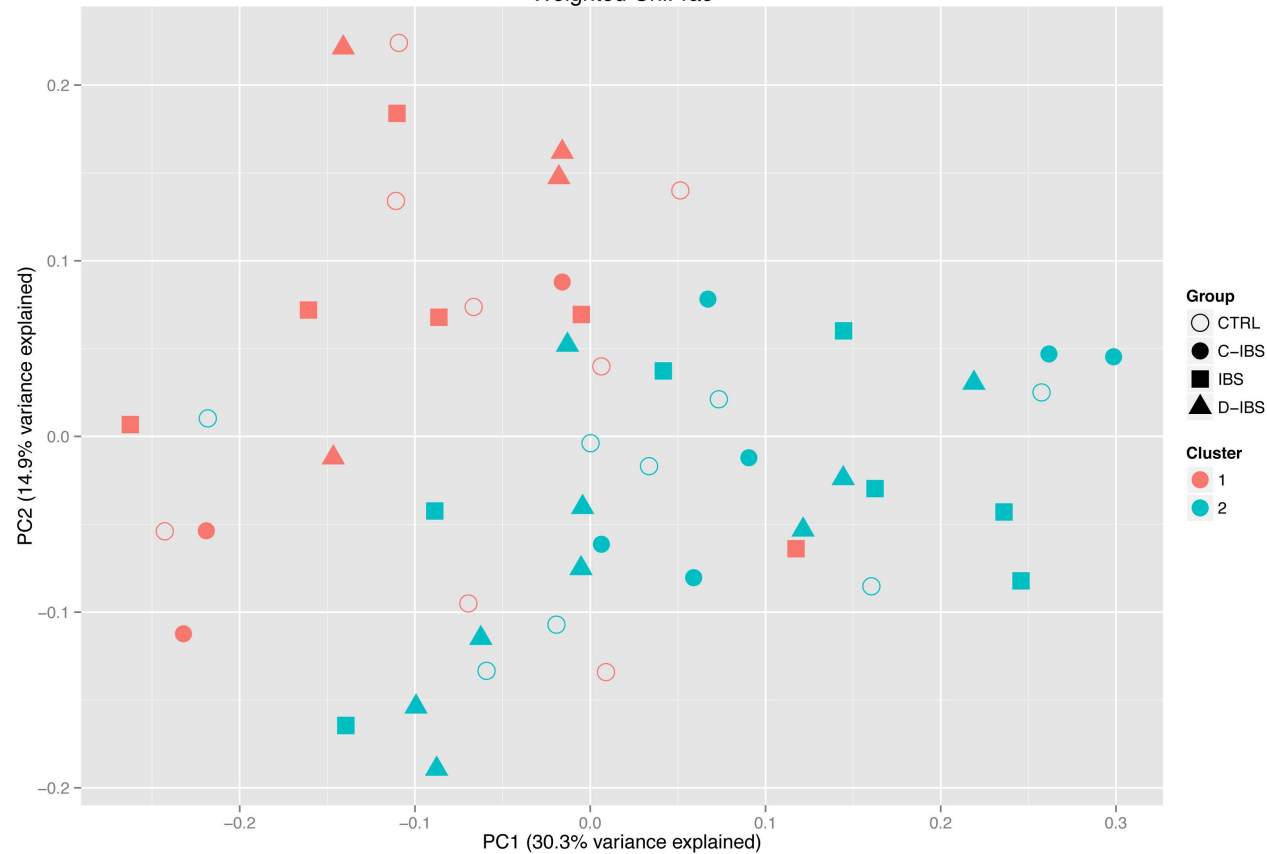

Supplementary Figure 2A

Bray-Curtis

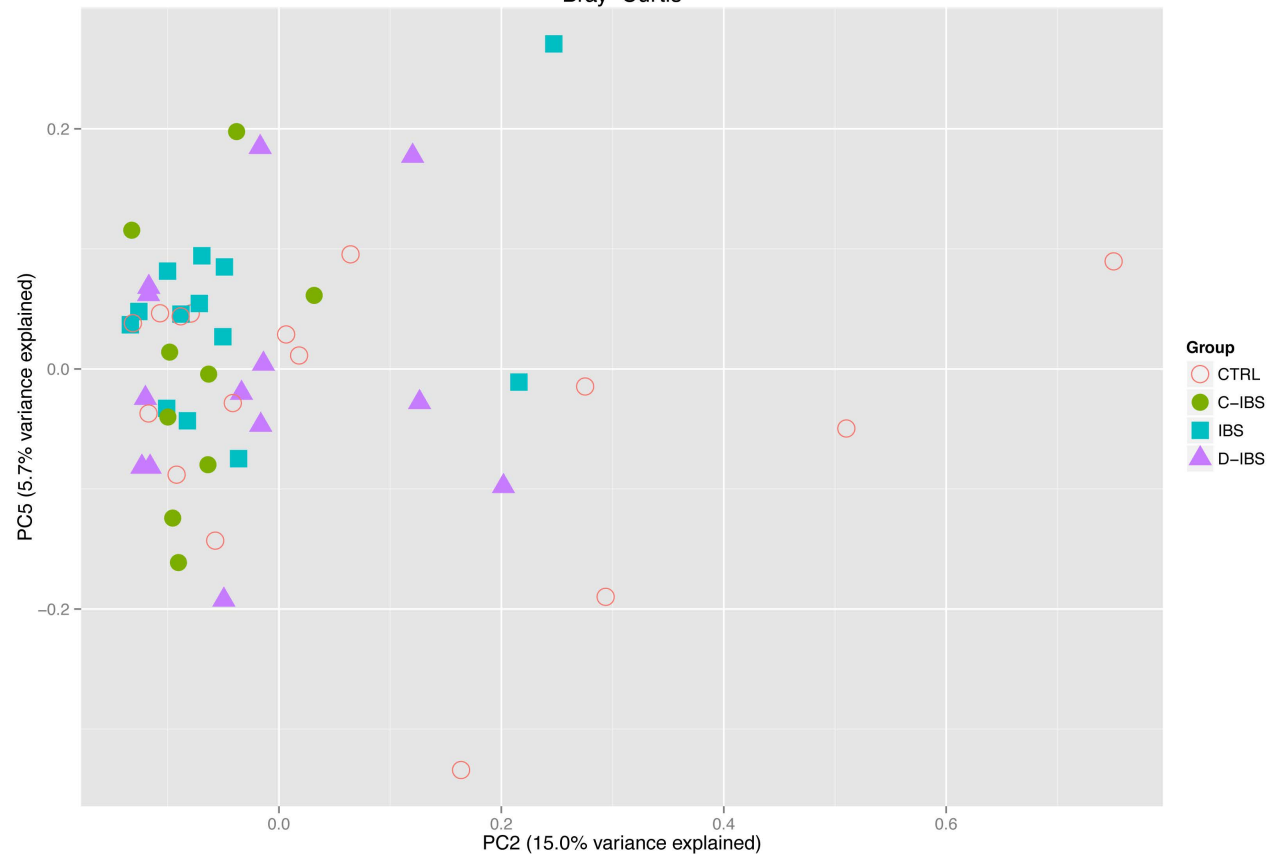

Supplementary Figure 2B

JSD

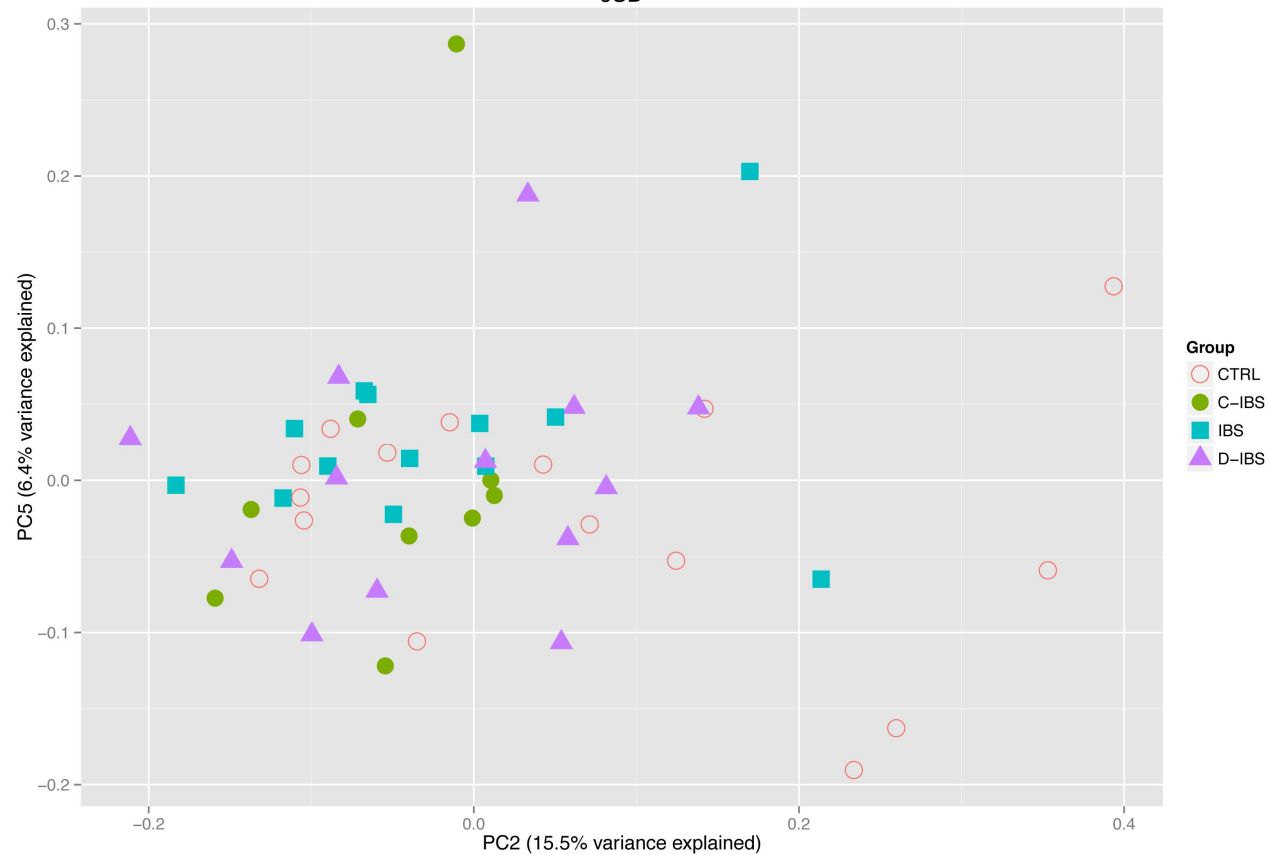

Supplementary Figure 2C

UniFrac

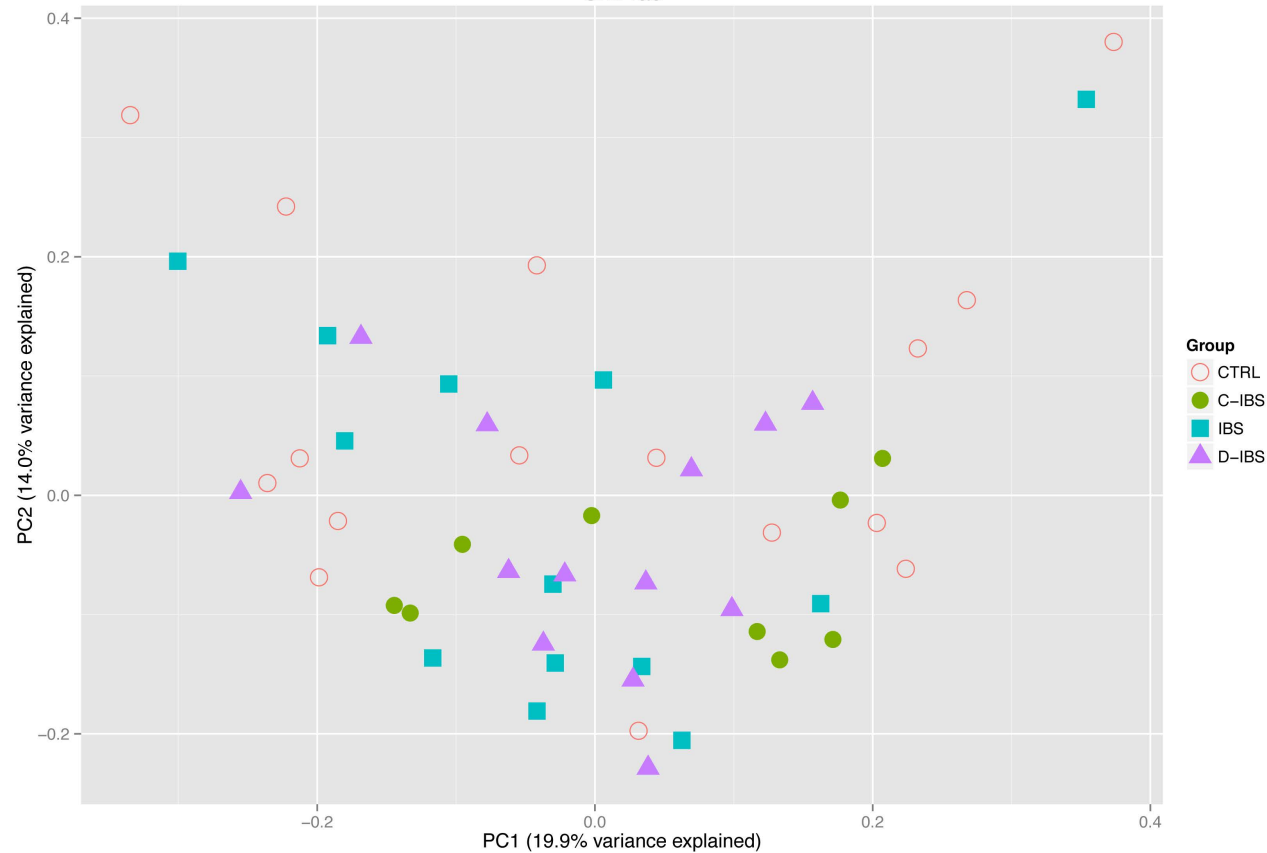

Supplement: srep08508-s1.pdf [file srep08508-s1.pdf]
